# Supplementary material for: Thyroid cancer diagnosis by Raman spectroscopy
Source: PubMed Central journal article supplement (PMC7414870; doi:10.1038/s41598-020-70165-0), 2020-08-07
Supplement: 41598_2020_70165_MOESM1_ESM.pdf [file 41598_2020_70165_MOESM1_ESM.pdf]

# Thyroid Cancer Diagnosis by Raman Spectroscopy

**Marco Sbroscia<sup>1,2</sup>, Michael Di Gioacchino<sup>1</sup>, Paolo Ascenzi<sup>1</sup>, Pierfilippo Crucitti<sup>3</sup>,  
Alessandra di Masi<sup>1</sup>, Isabella Giovannoni<sup>4</sup>, Filippo Longo<sup>3</sup>, Davide Mariotti<sup>1</sup>, Anda  
Mihaela Naciu<sup>5</sup>, Andrea Palermo<sup>5</sup>, Chiara Taffon<sup>4</sup>, Martina Verri<sup>4</sup>, Armida Sodo<sup>1,\*</sup>, Anna  
Crescenzi<sup>4</sup>, and Maria Antonietta Ricci<sup>1</sup>**

<sup>1</sup>Dipartimento di Scienze, Università degli Studi Roma Tre, via della Vasca Navale 84, 00146 Roma, Italy.

<sup>2</sup>present address: Dipartimento di Fisica, Sapienza Università di Roma, Piazzale A. Moro 5, 00185, Roma

<sup>3</sup>Unit of Thoracic Surgery, Campus Bio-Medico University, Roma, Italy

<sup>4</sup>Pathology Unit, Campus Biomedico University Hospital, Roma, Italy

<sup>5</sup>Unit of Endocrinology and Diabetes, Campus Bio-Medico University, Roma, Italy

\*e-mail: armida.sodo@uniroma3.it

## <sup>1</sup> **References**

- <sup>2</sup> **1.** Tessler, F. N. *et al.* Acr thyroid imaging, reporting and data system (ti-rads): White paper of the acr ti-rads committee. *J. Am. Coll. Radiol.* **14**, 587 – 595, DOI: <https://doi.org/10.1016/j.jacr.2017.01.046> (2017).

## <sup>4</sup> **Supplementary information**

**Table 1.** List of all the samples investigated by Raman Spectroscopy, along with clinical information. US Classification is done according to Tessler et al.<sup>1</sup>. Labels PTC, FV-PTC, FC, FA denote Papillary thyroid carcinoma, Follicular variant papillary thyroid carcinoma, Follicular thyroid carcinoma, Follicular thyroid adenoma, respectively. Label Oxy in the histology diagnosis refers to Oncocytic variants. Label HTT refers to Hyalinizing Trabecular Tumor. Finally, N.A. means not applicable. The superscript \*\* labels the samples used to generate the reference Raman spectra reported in Fig. ???. Sample TIR59 is inadequate for Raman spectroscopy investigation: it was indeed too thin and the spectrum was dominated by the signal from the glass slide.

| Samples | Gender | Age at diagnosis | US Classification (TI-RADS) <sup>1</sup> | Histology diagnosis | Raman Cluster  | Immunochemistry diagnosis revision |
|---------|--------|------------------|------------------------------------------|---------------------|----------------|------------------------------------|
| TIR43   | F      | 42               | 4                                        | FA Oxy              | FC             | FA with altered markers            |
| TIR44   | M      | 62               | 3                                        | FA                  | PTC            | FA with altered markers            |
| TIR45   | F      | 77               | 4                                        | PTC + FA Oxy        | FC             | PTC + FA Oxy                       |
| TIR46   | F      | 42               | 5                                        | PTC                 | PTC            |                                    |
| TIR47** | M      | 52               | 4                                        | FC Oxy              | FC             |                                    |
| TIR48   | F      | 43               | 4                                        | PTC Oxy             | PTC            |                                    |
| TIR 49  | F      | 45               | 4                                        | PTC                 | PTC            |                                    |
| TIR50   | F      | 30               | 5                                        | PTC                 | PTC            |                                    |
| TIR51** | M      | 58               | 4                                        | PTC                 | PTC            |                                    |
| TIR52   | M      | 44               | 4                                        | a) PTC<br>b) FC     | a)PTC<br>b) FC |                                    |
| TIR53   | F      | 27               | 4                                        | FA Oxy              | Benign         |                                    |
| TIR55** | M      | 74               | 4                                        | FC Oxy              | FC             |                                    |
| TIR56** | F      | 43               | 4                                        | FV-PTC              | FV-PTC         |                                    |
| TIR57   | F      | 47               | 4                                        | FV-PTC              | Benign         | FV-PTC                             |
| TIR58** | F      | 38               | 4                                        | PTC                 | PTC            |                                    |
| TIR59   | F      | 32               | 4                                        | FA Oxy              | Inadequate     |                                    |
| TIR60   | F      | 47               | 4                                        | PTC                 | PTC            |                                    |
| TIR61   | F      | 25               | 4                                        | PTC Oxy             | FC             | PTC Oxy                            |
| TIR62   | M      | 51               | 4                                        | FA                  | Benign         |                                    |
| TIR63   | F      | 31               | 3                                        | FV-PTC              | FV-PTC         |                                    |
| TIR64   | F      | 65               | 3                                        | FA                  | PTC            | FA with micro PTC                  |
| TIR68   | F      | 24               | 4                                        | PTC                 | PTC            |                                    |
| TIR70   | F      | 48               | 4                                        | PTC                 | PTC            |                                    |
| TIR71   | M      | 45               | 4                                        | FA Oxy              | FV-PTC         | FA with altered markers            |
| TIR72   | F      | 32               | 4                                        | PTC                 | PTC            |                                    |
| TIR73   | F      | 58               | 4                                        | HTT                 | PTC            | HTT and PTC share common features  |
| TIR74   | M      | 39               | 3                                        | FA Oxy              | Benign         |                                    |
| TIR75   | F      | 37               | 4                                        | FV-PTC              | PTC            | FV-PTC                             |
| TIR76   | F      | 42               | 5                                        | PTC                 | FV-PTC         |                                    |
| TIR77   | M      | 45               | 4                                        | PTC                 | FV-PTC         |                                    |
| Hea 43  | F      | 42               | N.A.                                     | Healthy             | Healthy        |                                    |
| Hea46   | F      | 42               | N.A.                                     | Healthy             | Healthy        |                                    |
| Hea48   | F      | 43               | N.A.                                     | Healthy             | Healthy        |                                    |
| Hea49** | F      | 45               | N.A.                                     | Healthy             | Healthy        |                                    |
| Hea50   | F      | 30               | N.A.                                     | Healthy             | Healthy        |                                    |
| Hea52   | M      | 44               | N.A.                                     | Healthy             | Healthy        |                                    |
| Hea56   | F      | 43               | N. A.                                    | Healthy             | FV-PTC         | Near tumor area                    |
| Hea 57  | F      | 47               | N.A.                                     | Healthy             | Healthy        |                                    |
| Hea62   | M      | 51               | N.A.                                     | Healthy             | Healthy        |                                    |
| Hea63   | F      | 31               | N.A.                                     | Healthy             | FV-PTC         | Near tumor area                    |
| Hea64** | F      | 65               | N.A.                                     | Healthy             | Healthy        |                                    |
| Hea68   | F      | 24               | N.A.                                     | Healthy             | Healthy        |                                    |
| Hea70   | F      | 48               | N.A.                                     | Healthy             | Healthy        |                                    |
| Hea72   | F      | 32               | N. A.                                    | Thyroiditis/Benign  | FV-PTC         | Near tumor area                    |
| Hea76   | F      | 42               | N.A.                                     | Healthy             | Healthy        |                                    |

## Supplementary Figure 1

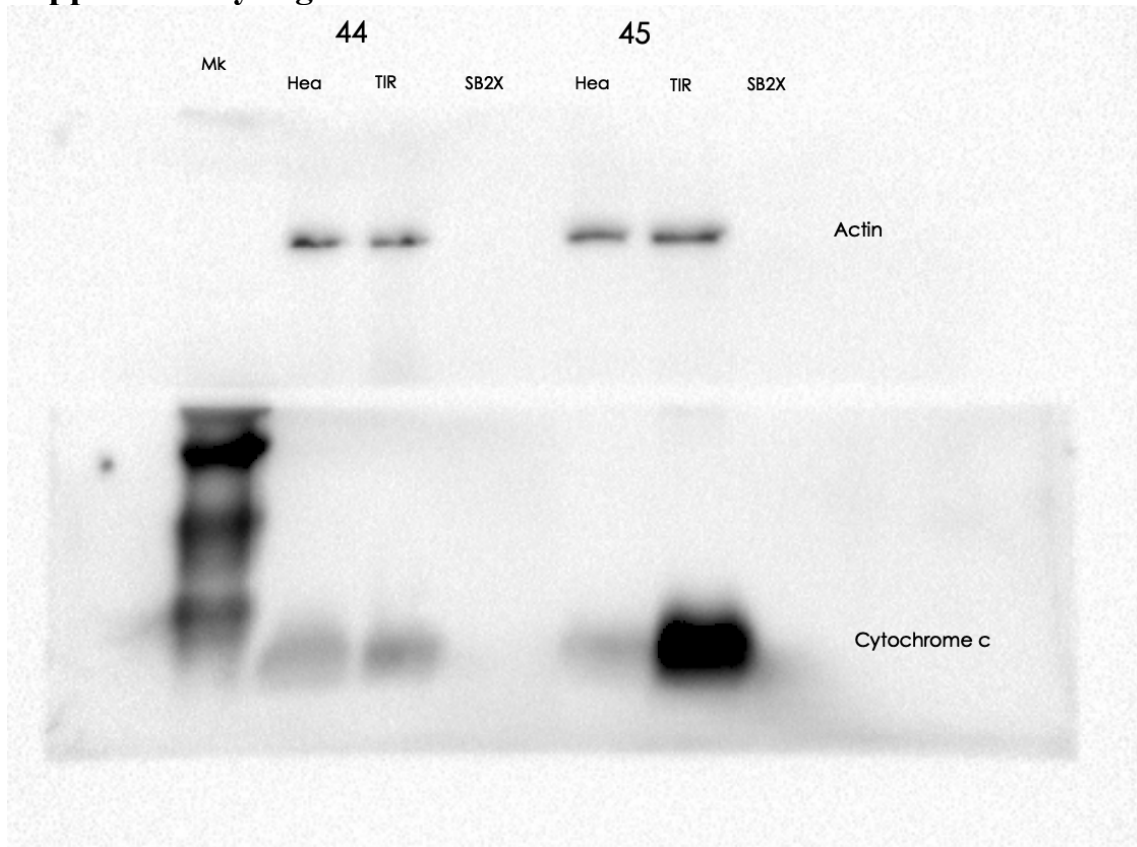

**Supplementary Figure 1.** Original images of data reported in Figure 5 with respect to patients 44 and 45. Filters were blotted with cytochrome *c* and actin primary antibodies. Images have been gathered at the same time. Mk, Marker; Hea, healthy tissue; TIR, pathological tissue; SB2X, sample buffer 2X.

## Supplementary Figure 2

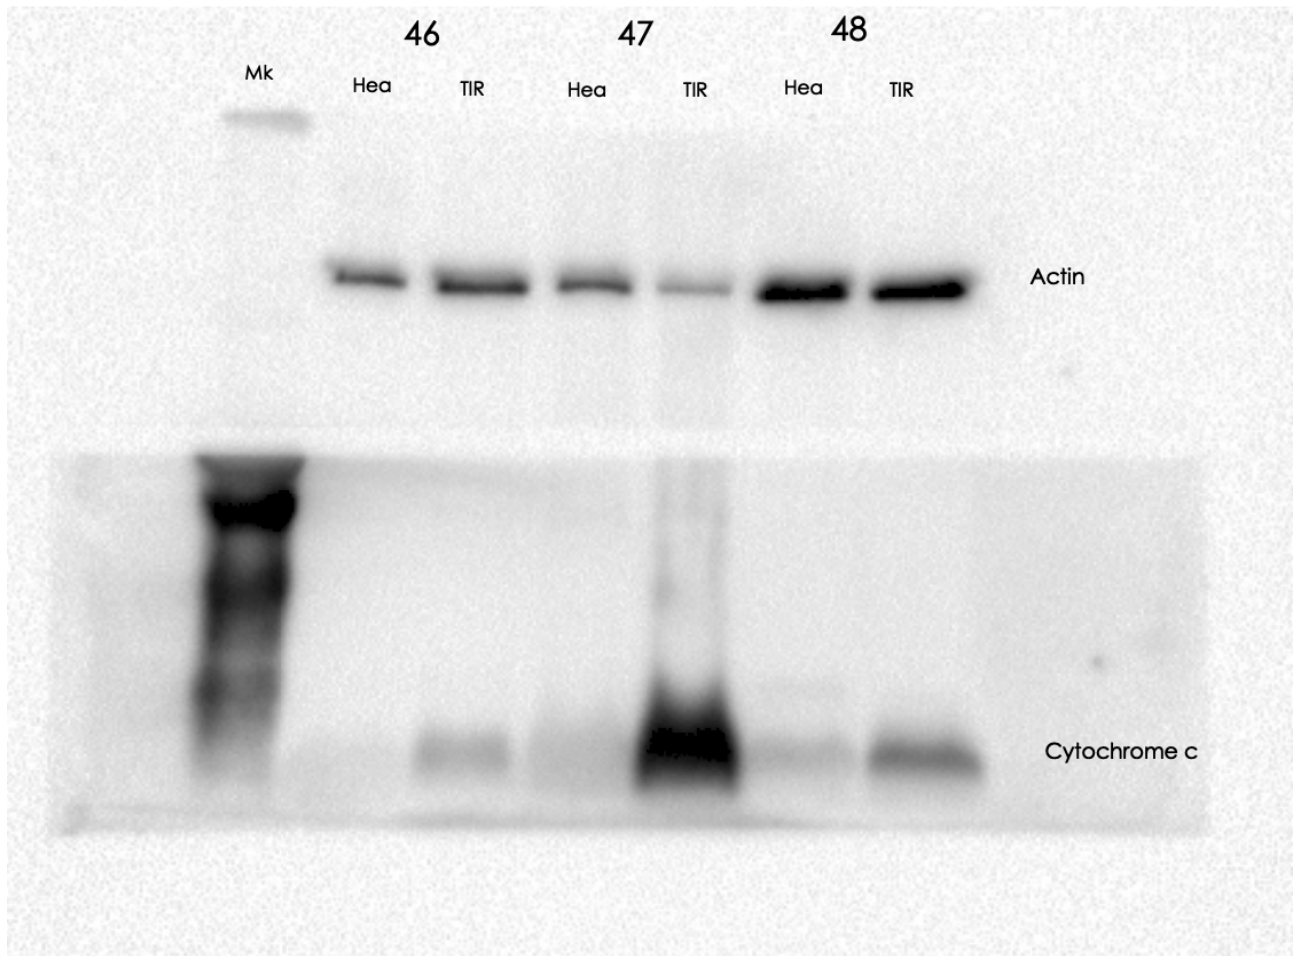

**Supplementary Figure 2.** Original images of data reported in Figure 5 with respect to patients 46, 47, and 48. Filters were blotted with cytochrome *c* and actin primary antibodies. Images have been gathered at the same time. Mk, Marker; Hea, healthy tissue; TIR, pathological tissue.
